# Supplementary material
Source: Springer Nature journal article supplement (https://www.springermedizin.de/resource/supplementary/12967_2013_1855_MOESM4_ESM.pdf/9574928)
Supplement: MOESM4 [file 9574928]

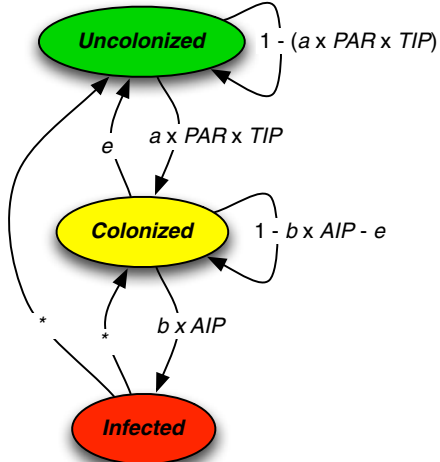

*PAR*: Place/Activity Risk parameter

*TIP*: Transmission Intensity Parameter

*AIP*: Activity Infection Parameter

\* indicates transition is addressed by discrete event scheduling

*PAR* = {high: 2, moderate: 1, negligible: 0.1}

*TIP* = 1 if U has contact with C

= 2 if U has contact with I

*AIP* varies by activity type
